# Supplementary material for: Characterization of LINE-1 transposons in a human genome at allelic resolution
Source: bioRxiv or medRxiv preprint supplement (doi:10.1101/594200), 2019-04-01

Figure S2

A

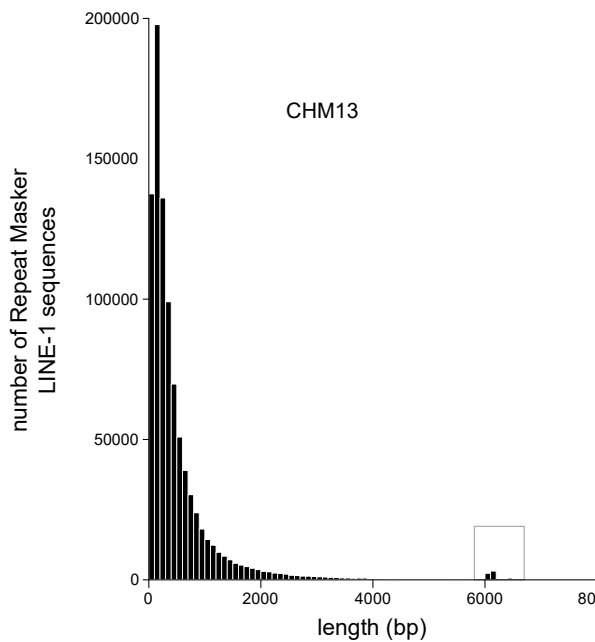

B

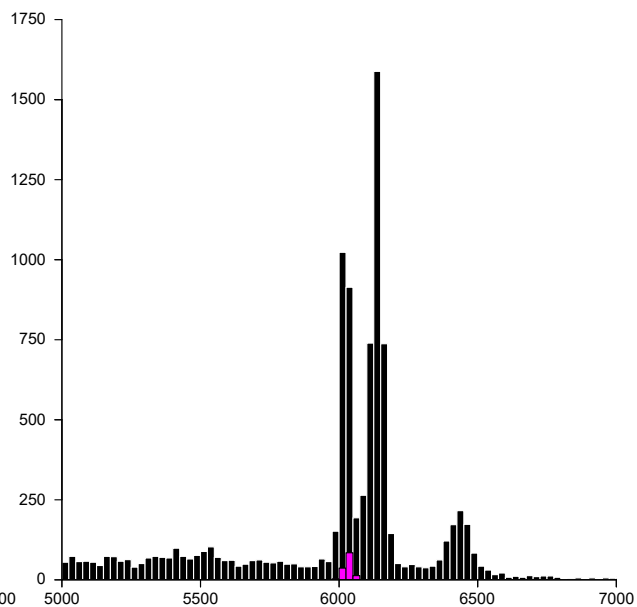

C

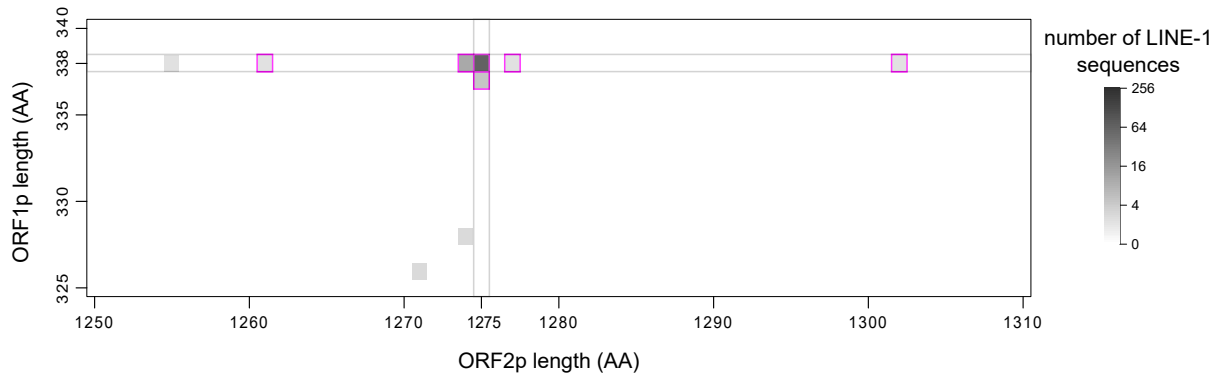

Supplement: Supplementary file [file media-2.pdf]
